# Supplementary material for: Active Video Games for Improving Mental Health and Physical Fitness—An Alternative for Children and Adolescents during Social Isolation: An Overview
Source: PubMed Central journal article supplement (PMC7915633; doi:10.3390/ijerph18041641), 2021-02-09
Supplement: ijerph-18-01641-s001.pdf [file ijerph-18-01641-s001.pdf]

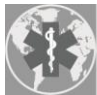

Supplementary material

**Table S1. Studies excluded**

| <b>Authors, Year</b>        | <b>Exclusion</b>      |
|-----------------------------|-----------------------|
| Barkman et al., 2014        | No systematic review  |
| Barnett et al., 2011        | No healthy population |
| Barnes & Prescott, 2018     | No healthy population |
| Benzing, Schmidt, 2018      | No systematic review  |
| Biddiss & Irwin, 2010       | No healthy population |
| Brilliant et al., 2019      | No healthy population |
| Brown et al., 2016          | No AVGs               |
| Ferguson, 2015              | Different outcome     |
| Garrido et al., 2019        | No AVGs               |
| Hocking et al., 2019        | No healthy population |
| John, Sharma, Kapanee, 2019 | No AVGs               |
| Jurdi et al., 2018          | No healthy population |
| Li, Theng, Foo, 2016        | No healthy population |
| Mentiplay et al., 2019      | No healthy population |
| Norris et al., 2016         | No healthy population |
| Nicole et al., 2014         | No systematic review  |
| Page et al., 2017           | No healthy population |
| Perrochon et al., 2019      | No healthy population |
| Simmich et al., 2019        | No healthy population |
| Sun, 2015                   | No systematic review  |
| Sugaya et al., 2019         | No AVGs               |
| Tomé, 2017                  | No AVGs               |
| Tripette et al., 2017       | No healthy population |
| Ufholz et al., 2019         | No systematic review  |
| Viana et al., 2020          | No healthy population |
| Wu et al., 2019             | No healthy population |
| Zayeni et al., 2020         | No healthy population |

Note: AVGs – Active video games.
